# Supplementary material
Source: Springer Nature journal article supplement (https://www.springermedizin.de/resource/supplementary/12985_2013_2545_MOESM4_ESM.pdf/9606942)
Supplement: MOESM4 [file 9606942]

|          |                                                 |                    |    |
|----------|-------------------------------------------------|--------------------|----|
| CVB3/28  | -TACCCCCTCCCCCAACTGTAAGTACACACAC---             | CGATCAACAGTCAGCG   | 55 |
| CVB3/20  | -.....                                          | -----              | 55 |
| CVB3/MKP | -.....                                          | -----              | 55 |
| CVB3-AS  | -AGT....TT.....TC.....C.....                    | ---T.....T...T.... | 55 |
| CVB3/GA  | -...A...CT...CGA.....TCA.TG..AG---              | .G..G.T..C....C    | 56 |
| CVB3/CO  | CA.TT.....TTCTTT.A.....C..GCA.G.TAAGA..G..G.... | GCGACA             | 60 |

|          |                                         |    |
|----------|-----------------------------------------|----|
| CVB3/28  | TGGCACACCAGCCACGTTTTGATCAAGCACTTCTGTTAC | 94 |
| CVB3/20  | .....                                   | 94 |
| CVB3/MKP | .....                                   | 94 |
| CVB3/AS  | .....A.....T.....G.....                 | 94 |
| CVB3/GA  | CAA..C.....TTGG...CA.....               | 95 |
| CVB3/CO  | CA...AA.....TGT..C.A..C.....G..         | 99 |
